# Supplementary material for: Effect of Wine Lees as Alternative Antioxidants on Physicochemical and Sensorial Composition of Deer Burgers Stored during Chilled Storage
Source: PubMed Central journal article supplement (PMC7463938; doi:10.3390/antiox9080687), 2020-08-02
Supplement: antioxidants-09-00687-s001.pdf [file antioxidants-09-00687-s001.pdf]

## Supplementary material

# Unraveling the lipidome and antioxidant activity of native *Bifurcaria bifurcata* and invasive *Sargassum muticum* seaweeds: A lipid perspective on how systemic intrusion may present an opportunity

Fábio Santos<sup>1</sup>, João P. Monteiro<sup>1,2</sup>, Daniela Duarte<sup>1</sup>, Tânia Melo<sup>1,2</sup>, Diana Lopes<sup>1,2</sup>, Elisabete da Costa<sup>1,2</sup>, and M. Rosário Domingues<sup>1,2,\*</sup>

<sup>1</sup> Mass Spectrometry Centre, LAQV-REQUIMTE, Department of Chemistry, University of Aveiro, Santiago University Campus, 3810-193 Aveiro, Portugal; fabiofs379@gmail.com (F.S.), jpspmonteiro@yahoo.com (J.M.), danieladuarte98@ua.pt (D.D.), taniamelou@ua.pt (T.M.), dianasalzedaslopes@ua.pt (D.L.), elisabetecosta@ua.pt (E.d.C.), mrd@ua.pt (M.R.D.)

<sup>2</sup> CESAM - Centre for Environmental and Marine Studies, Department of Chemistry, University of Aveiro, Santiago University Campus, 3810-193 Aveiro, Portugal

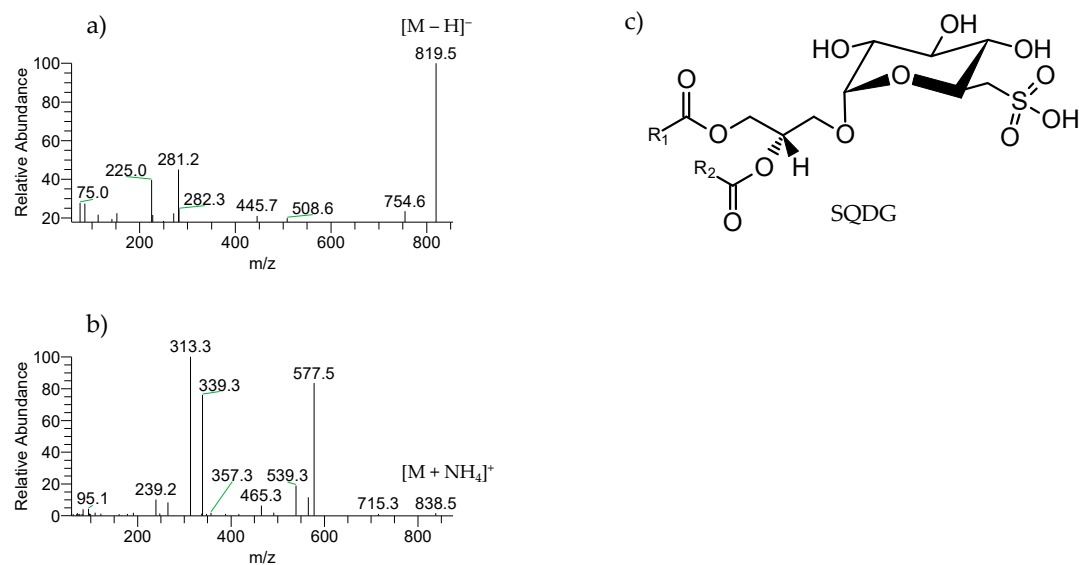

**Figure S1.** LC-MS/MS spectra of SQDG (34:1), namely of the  $[M - H]^-$  ion at  $m/z$  819.5 (a) and  $[M + NH_4]^+$  ion at  $m/z$  838.5 (b). The SQDG (34:1), was identified as SQDG (16:0/18:1) species. Typical fragmentation of SQDG species observed in LC-MS/MS spectrum of  $[M - H]^-$  ions at  $m/z$  819.5 showed the characteristic ion at  $m/z$  225.0, corresponding to the dehydrosulfoglycosyl anion ( $[C_6H_9O_7S]^-$ ) of the polar head group that confirms the sulfoglycolipid class (a). The neutral loss of 261 Da, corresponding to the loss of sulfoglycosyl group ( $C_6H_{12}O_8S$ ) and ammonia ( $NH_3$ ) observed in LC-MS/MS spectrum of  $[M + NH_4]^+$  ion, confirms the sulfonoglycolipid identity. The fatty acyl chains can be confirmed in positive mode due to the presence of the acylium ion of fatty acyl chain plus 74 ( $[RCO + 74]^+$  ions). These ions can be seen at  $m/z$  313.3 and  $m/z$  339.3 in the LC-MS/MS spectrum of  $[M + NH_4]^+$  ion of SQDG (16:0/18:1), corresponding to 16:0 and 18:1 fatty acids, confirming the SQDG (16:0/18:1) species (c). The representative structure of SQDG is depicted (c).

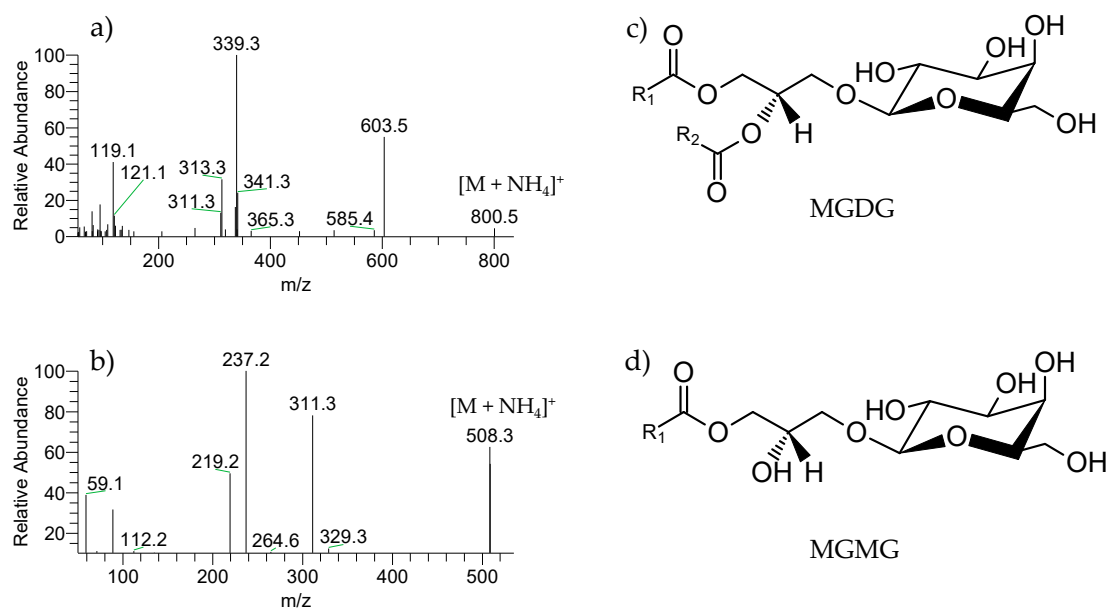

**Figure S2.** LC-MS/MS spectra of  $[M + NH_4]^+$  ions of MGDG (36:2), at  $m/z$  800.5 corresponding to MGDG (16:0/20:2), (18:0/18:2), (18:1/18:1) and (16:1/20:1) species, (a) and of  $[M + NH_4]^+$  ion of MGMG (16:1) at  $m/z$  508.3 (b). The LC-MS/MS spectrum of the  $[M + NH_4]^+$  ion of MGDG (36:2) at  $m/z$  800.5 (a) showed a typical combined loss of  $NH_3$  plus loss of galactosyl unit (-197 Da), a typical fragmentation of MGDG species with formation of the product ion at  $m/z$  603.5 [1,2]. The product ions  $[RCO + 74]^+$  seen at  $m/z$  311.3,  $m/z$  313.3,  $m/z$  339.3,  $m/z$  341.3 and  $m/z$  365.3, corresponding to the fatty acids 16:1, 16:0, 18:1, 18:0 and 20:2, respectively, allowed to pinpoint fatty acyl composition and to propose the contribution of the lipid molecular species MGDG (16:0/20:2), (18:1/18:1), (18:0/18:2) and (16:1/20:1) for the MGDG (36:2) (Table S1). The LC-MS/MS spectrum of  $[M + NH_4]^+$  of MGMG (16:1) at  $m/z$  508.3 (b) showed the typical neutral loss of 197 Da, due to the combined loss of  $NH_3$  and galactosyl residue (-179 Da), with the formation of the product ion at  $m/z$  311.3. For the MGMG class, the fatty acyl chain composition can be observed as  $[RCO]^+$  and  $[RCO + 74]^+$  product ions, seen at  $m/z$  237.2 and  $m/z$  311.3, respectively, which correspond to the fatty acid 16:1 confirming the presence of the MGMG (16:1) (b). The representative structure of MGDG (c) and MGMG (d) are depicted in the figure.

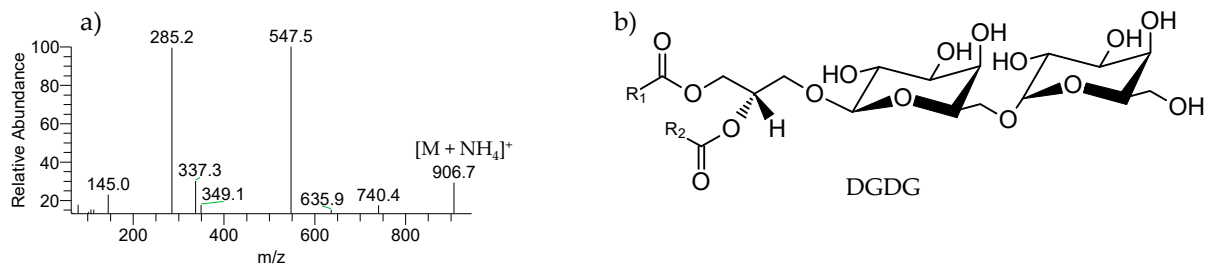

**Figure S3.** LC-MS/MS spectrum of  $[M + NH_4]^+$  ion of DGDG (32:2) at  $m/z$  906.7 corresponding to the DGDG (14:0/18:2) species (a). The typical fragmentation of this class of GL, namely neutral loss of the carbohydrate moiety (loss of 180 + 162 Da) combined with loss of  $NH_3$  (-17 Da) is seen as a total neutral loss of (-359 Da) with formation of the product ion at  $m/z$  547.5. The  $[RCO + 74]^+$  product ions allow to confirm the fatty acyl composition and are seen at  $m/z$  285.2 and  $m/z$  337.3, corresponding to the fatty acids 14:0 and 18:2, respectively, confirming the presence of the DGDG (14:0/18:2). The representative structure of DGDG is depicted in the figure.

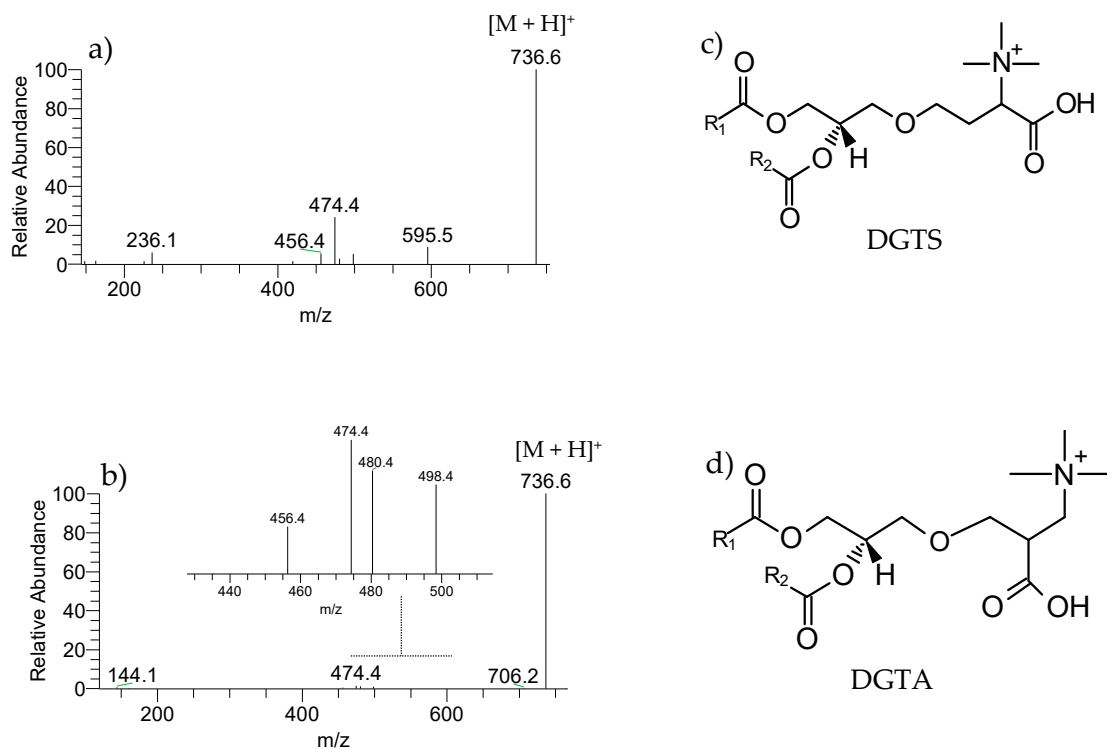

**Figure S4.** LC-MS/MS spectra of  $[M + H]^+$  ion at  $m/z$  736.6 of DGTS (34:2), corresponding to the DGTS (16:0/18:2) species (a) and the DGTA (34:2), namely DGTA (16:0/18:2) species, at  $m/z$  736.6 (b). These two isomeric betaine classes eluted at different retention times: DGTS at  $RT = 4.2$  and DGTA at  $RT = 9.4$ . LC-MS/MS spectra of DGTS (34:2) (a) and DGTA (34:2) (b) show the typical reported product ions of these classes at  $m/z$  144.1, corresponding to loss of both fatty acyl groups as keto derivatives ( $R_1CO + R_2CO$ ) plus glycerol, and at  $m/z$  236.1 corresponding to the loss of both fatty acyl chains as keto derivatives ( $R_1CO + R_2CO$ ) [3–5]. These characteristic product ions at  $m/z$  144.1 and  $m/z$  236.1 can be used to conduct the qualitative characterization of DGTS and DGTA classes as positive  $[M + H]^+$  ions, but it can't be used to differentiate DGTS from DGTA, since both ions can be present in DGTA and DGTS spectra [6]. In these cases, the DGTA and DGTS differentiation can only be made by the specific retention time of each class, as mentioned before [6]. The fatty acyl composition can be assigned by the losses of fatty acyl chains as acid ( $-RCOOH$ ) and ketene ( $-R=C=O$ ) derivatives. In the spectrum of DGTS (16:0/18:2) (a), the ion at  $m/z$  474.4 corresponds to the loss of 18:2 fatty acyl chain as keto derivative ( $-262$  Da) and the at  $m/z$  456.4 corresponds to 18:2 as  $RCOOH$  ( $-280$  Da), confirming the presence of the fatty acid 18:2. In the LC-MS/MS spectrum of DGTA (16:0/18:2) (b), the ions at  $m/z$  498.4 and 474.4 corresponding to the loss of fatty acyl chains as keto derivatives ( $-238$  and  $-262$  Da), match to 16:0 and 18:2 fatty acids, respectively. Moreover, the ions at  $m/z$  480.4 and 456.4 confirmed the presence of the fatty acids 16:0 and 18:2, respectively, since they correspond to the loss of  $RCOOH$  ( $-256$  and  $-280$  Da). The representative structures of DGTS (c) and DGTA (d) are depicted in the figure.

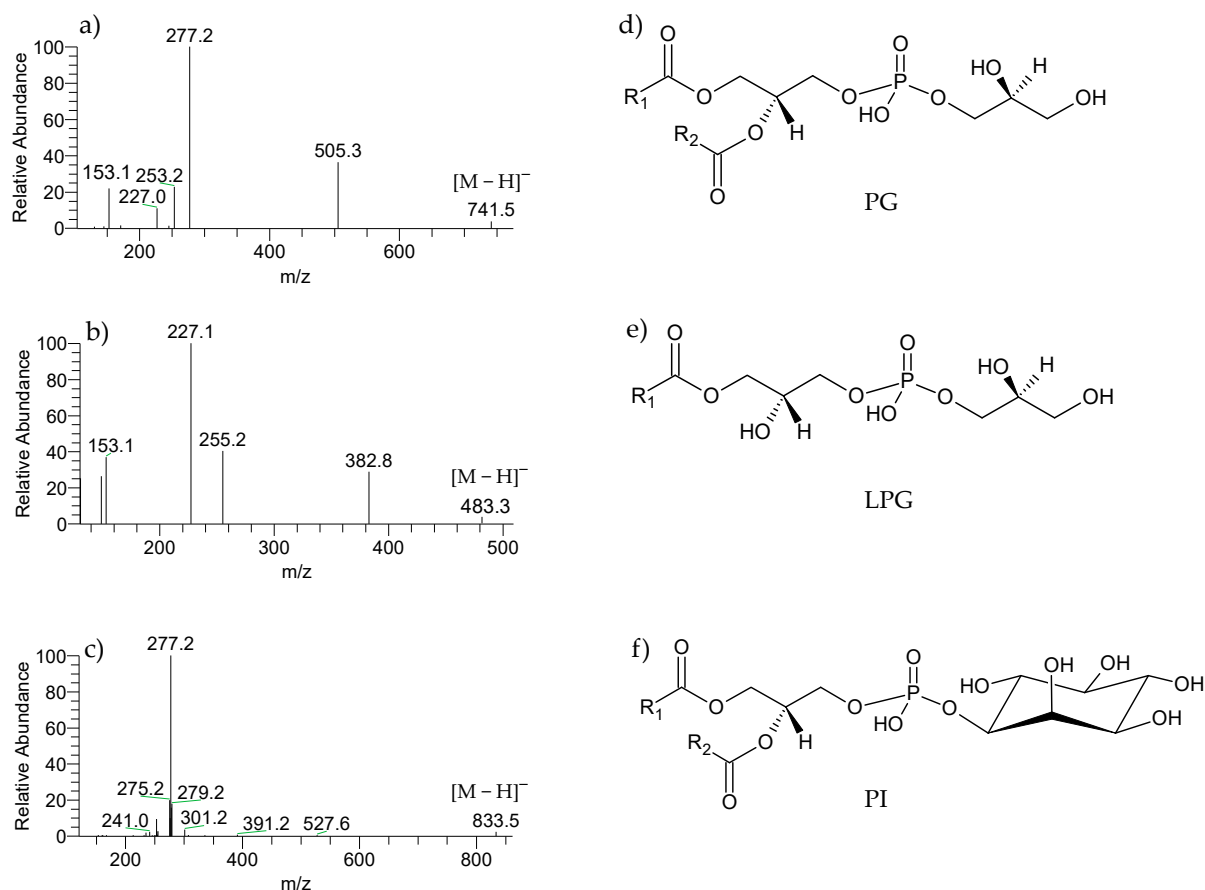

**Figure S5.** LC-MS/MS spectra of  $[M - H]^-$  ions of PG (34:4) at  $m/z$  741.5, corresponding to the PG (18:3/16:1) species (a), LPG (16:0) at  $m/z$  483.3 (b), and PI (34:2) at  $m/z$  833.5 corresponding to the PI (18:2/16:0) species, (c). PG (a) and LPG (b) species were identified by the presence of the product ion at  $m/z$  153.1, corresponding to glycerol phosphate minus one water molecule, and  $m/z$  227.1 corresponding to  $[C_6H_{12}O_7P]^-$  anion corresponding to glycerophosphate glycerol minus one water molecule [3]. The PI class (c) was identified in the MS/MS spectra through the characteristic product ion at  $m/z$  241.0 that corresponds to the inositol-1,2-cyclic phosphate anion ( $[C_6H_{10}O_5PO_3]^-$ ) of the polar head of PI [1]. The carboxylate anions ( $R_1COO^-$  and  $R_2COO^-$ ) allowed the identification of fatty acyl chains in PG, its lyso form, and PI [7]. The representative structures of PG (d), LPG (e), and PI (f) are depicted in the figure.

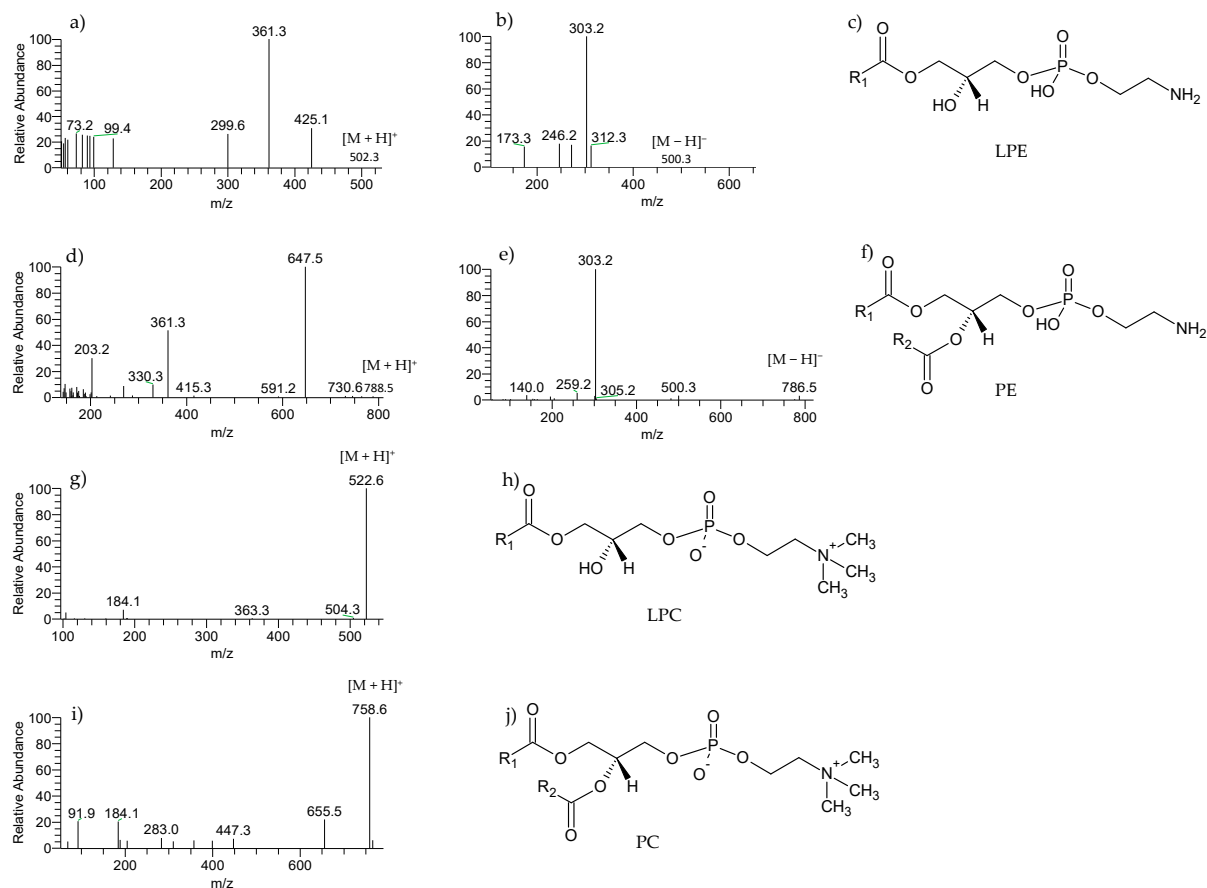

**Figure S6.** LC-MS/MS spectra of the  $[M + H]^+$  ion of LPE (20:4) at  $m/z$  502.3 (a),  $[M - H]^-$  ion of LPE (20:4) at  $m/z$  500.3 (b);  $[M + H]^+$  ion of PE (40:8) at  $m/z$  788.5, corresponding to the PE (20:4/20:4) and PE (20:3/20:5) species (d);  $[M - H]^-$  ion of PE (40:8) at  $m/z$  786.5 corresponding to the PE (20:4/20:4) and PE (20:3/20:5) species (e);  $[M + H]^+$  ion at  $m/z$  522.6 of LPC (18:1) (g); and  $[M + H]^+$  ion at  $m/z$  758.6 of PC (34:2) (i). Typical loss of 141 Da was observed in the LC-MS/MS spectra of  $[M + H]^+$  ions of LPE (a) and PE (d), while the carboxylate anions ( $RCOO^-$ ) of the fatty acyl chains were identified in the LC-MS/MS spectra of  $[M - H]^-$  ions of LPE (b) and PE (e). The LC-MS/MS spectra of  $[M + H]^+$  ions of LPC (g) and PC (i) showed the typical product ion of the polar head at  $m/z$  184.0. The representative structures of LPE (c), PE (f), LPC (h), and PC (j) are depicted in the figure.

**Tandem mass spectrometry analysis was based on the following literature:**

1. Lopes, D.; Moreira, A. S. P.; Rey, F.; da Costa, E.; Melo, T.; Maciel, E.; Rego, A.; Abreu, M. H.; Domingues, P.; Calado, R.; Lillebø, A. I.; Rosário Domingues, M. Lipidomic signature of the green macroalgae *Ulva rigida* farmed in a sustainable integrated multi-trophic aquaculture. *J. Appl. Phycol.* **2018**.
2. Da Costa, E.; Domingues, P.; Melo, T.; Coelho, E.; Pereira, R.; Calado, R.; Abreu, M. H.; Domingues, M. R. Lipidomic signatures reveal seasonal shifts on the relative abundance of high-valued lipids from the brown algae *Fucus vesiculosus*. *Mar. Drugs* **2019**.
3. Melo, T.; Alves, E.; Azevedo, V.; Martins, A. S.; Neves, B.; Domingues, P.; Calado, R.; Abreu, M. H.; Domingues, M. R. Lipidomics as a new approach for the bioprospecting of marine macroalgae – Unraveling the polar lipid and fatty acid composition of *Chondrus crispus*. *Algal Res.* **2015**.
4. Da Costa, E.; Melo, T.; Moreira, A. S. P. A.; Bernardo, C.; Helguero, L.; Ferreira, I.; Cruz, M. T. M.; Rego, A. M. A.; Domingues, P.; Calado, R.; Abreu, M. M. H.; Domingues, M. Valorization of lipids from *Gracilaria* sp. through lipidomics and decoding of antiproliferative and anti-inflammatory Activity. *Mar. Drugs* **2017**.
5. Roche, S. A.; Leblond, J. D. Betaine lipids in chlorarachniophytes. *Phycol. Res.* **2010**.
6. Li, Y.; Lou, Y.; Mu, T.; Xu, J.; Zhou, C.; Yan, X. Simultaneous structural identification of diacylglyceryl-N-trimethylhomoserine (DGTS) and diacylglycerylhydroxymethyl-N,N,N-trimethyl- $\beta$ -alanine (DGTA) in microalgae using dual Li<sup>+</sup>/H<sup>+</sup> adduct ion mode by ultra-performance liquid chromatography/quadrupole ti. *Rapid Commun. Mass Spectrom.* **2017**.
7. Murphy, R. C. *Tandem Mass Spectrometry of Lipids*; Ron M A Heeren Mitsutoshi Setou, R. C. M., Ed.; Royal Soci.; TGHomas Graham House, Science Park, Milton Road, 2014; ISBN 9781849738279.



**Table S1.** Molecular species identified by HILIC-MS in *B. bifurcata*. Identification of different polar lipid classes and fatty acyl composition was confirmed by the analysis of the LC-MS/MS spectra of each ion. C represents the total number of carbon atoms and N the total number of double bonds on the fatty acyl chains. The most abundant species are marked in bold.

| Lipid species (C:N)                                        | Observed m/z    | Delta (ppm)   | Retention time | Fatty acyl chains (C:N)                               | Formula           |
|------------------------------------------------------------|-----------------|---------------|----------------|-------------------------------------------------------|-------------------|
| <b>MGDG identified as [M + NH<sub>4</sub>]<sup>+</sup></b> |                 |               |                |                                                       |                   |
| MGDG(30:4)                                                 | 712.5000        | 0.0000        | 2.05           | (14:0/16:4)                                           | C39H70NO10        |
| MGDG(30:1)                                                 | 718.5477        | 1.8092        | 2.16           | (14:0/16:1)                                           | C39H76NO10        |
| MGDG(32:4)                                                 | 740.5307        | 0.0000        | 2.08           | (16:0/16:4) and (14:1/18:3)                           | C41H74NO10        |
| MGDG(32:3)                                                 | 742.5487        | 3.0974        | 2.32           | (18:3/14:0) and (16:1/16:2)                           | C41H76NO10        |
| MGDG(32:2)                                                 | 744.5618        | -1.0745       | 2.13           | (16:1/16:1) and (18:2/14:0)                           | C41H78NO10        |
| MGDG(32:1)                                                 | 746.5775        | -0.2679       | 2.13           | (16:0/16:1) and (18:1/14:0)                           | C41H80NO10        |
| MGDG(34:4)                                                 | 768.5627        | 0.1301        | 2.08           | (18:4/16:0), (18:3/16:1) and (14:0/20:4)              | C43H78NO10        |
| MGDG(34:3)                                                 | 770.5771        | -1.4586       | 2.13           | (16:0/18:3) and (18:2/16:1)                           | C43H80NO10        |
| MGDG(34:2)                                                 | 772.5932        | -0.1294       | 2.13           | (16:0/18:2)                                           | C43H82NO10        |
| <b>MGDG(34:1)</b>                                          | <b>774.6092</b> | <b>0.2582</b> | <b>2.16</b>    | <b>(16:0/18:1)</b>                                    | <b>C43H84NO10</b> |
| MGDG(36:8)                                                 | 788.5308        | -0.596        | 2.21           | (18:4/18:4) and (20:4/16:4)                           | C45H74NO10        |
| MGDG(36:7)                                                 | 790.5469        | 0.0000        | 2.16           | (18:3/18:4)                                           | C45H76NO10        |
| MGDG(36:6)                                                 | 792.5616        | -1.1356       | 2.18           | (18:3/18:3) and (18:4/18:2)                           | C45H78NO10        |
| MGDG(36:5)                                                 | 794.5788        | 0.7551        | 2.13           | (18:3/18:2), (20:4/16:1) and (20:5/16:0)              | C45H80NO10        |
| MGDG(36:4)                                                 | 796.5942        | 1.1298        | 2.16           | (18:3/18:1), (18:2/18:2) and (20:4/16:0)              | C45H82NO10        |
| MGDG(36:3)                                                 | 798.6082        | -1.6529       | 2.16           | (16:1/20:2), (18:2/18:1) and (16:0/20:3)              | C45H84NO10        |
| MGDG(36:2)                                                 | 800.6249        | -0.3422       | 2.18           | (18:1/18:1) and (16:0/20:2)                           | C45H86NO10        |
| MGDG(38:10)                                                | 812.5319        | 0.7754        | 2.02           | *                                                     | C47H74NO10        |
| MGDG(38:9)                                                 | 814.5463        | -0.7661       | 2.13           | (20:5/18:4)                                           | C47H76NO10        |
| MGDG(38:8)                                                 | 816.5617        | -1.0654       | 2.13           | (20:4/18:4) and (20:5/18:3)                           | C47H78NO10        |
| MGDG(38:7)                                                 | 818.5761        | -2.5947       | 2.18           | (18:3/20:4)                                           | C47H80NO10        |
| MGDG(38:6)                                                 | 820.5934        | -0.6093       | 2.16           | (18:1/20:5)                                           | C47H82NO10        |
| MGDG(38:5)                                                 | 822.6093        | -0.2674       | 2.08           | (18:1/20:4), (20:3/18:2), (18:3/20:2) and (18:4/20:1) | C47H84NO10        |
| MGDG(40:10)                                                | 840.5645        | 2.2961        | 1.77           | (20:5/20:5)                                           | C49H78NO10        |
| MGDG(40:9)                                                 | 842.5782        | 0.0000        | 2.13           | (20:5/20:4)                                           | C49H80NO10        |
| MGDG(40:8)                                                 | 844.5933        | -0.6749       | 2.13           | (20:4/20:4)                                           | C49H82NO10        |
| <b>DGDG identified as [M + NH<sub>4</sub>]<sup>+</sup></b> |                 |               |                |                                                       |                   |
| DGDG(28:0)                                                 | 854.582         | -2.4573       | 2.74           | *                                                     | C43H84O15N        |
| DGDG(32:3)                                                 | 904.5995        | -0.2211       | 2.32           | (14:0/18:3)                                           | C47H86O15N        |
| DGDG(32:2)                                                 | 906.6154        | 0.0000        | 2.35           | (18:2/14:0) and (16:1/16:1)                           | C47H88O15N        |
| DGDG(32:1)                                                 | 908.6310        | 0.0000        | 2.33           | (16:0/16:1) and (14:0/18:1)                           | C47H90O15N        |
| DGDG(34:4)                                                 | 930.6154        | 0.0000        | 2.30           | (18:3/16:1) and (16:0/18:4)                           | C49H88O15N        |
| DGDG(34:3)                                                 | 932.6308        | -0.2144       | 2.33           | (18:3/16:0)                                           | C49H90O15N        |
| DGDG(34:2)                                                 | 934.6457        | -1.0699       | 2.44           | (16:0/18:2) and (18:1/16:1)                           | C49H92O15N        |
| DGDG(34:1)                                                 | 936.6619        | -0.427        | 2.32           | (16:0/18:1)                                           | C49H94O15N        |

|                   |                 |               |             |                                          |                   |
|-------------------|-----------------|---------------|-------------|------------------------------------------|-------------------|
| DGDG(36:7)        | 952.6001        | 0.4199        | 2.39        | (18:4/18:3)                              | C51H86O15N        |
| DGDG(36:6)        | 954.6152        | -0.2095       | 2.32        | (18:3/18:3) and (16:1/20:5)              | C51H88O15N        |
| DGDG(36:5)        | 956.6299        | -1.1499       | 2.33        | (20:5/16:0), (18:3/18:2) and (16:1/20:4) | C51H90O15N        |
| DGDG(36:4)        | 958.6467        | 0.0000        | 2.39        | *                                        | C51H92O15N        |
| <b>DGDG(38:9)</b> | <b>976.5997</b> | <b>0.0000</b> | <b>2.46</b> | <b>(18:4/20:5)</b>                       | <b>C53H86O15N</b> |
| DGDG(38:8)        | 978.6155        | 0.1022        | 2.45        | *                                        | C53H88O15N        |

**SQDG identified as [M - H]<sup>-</sup>**

|                   |                 |               |             |                                                 |                   |
|-------------------|-----------------|---------------|-------------|-------------------------------------------------|-------------------|
| SQDG(30:1)        | 763.4667        | 0.0956        | 1.69        | (14:0/16:1)                                     | C39H71O12S        |
| SQDG(30:0)        | 765.4823        | 0.0300        | 1.82        | (16:0/14:0)                                     | C39H73O12S        |
| SQDG(32:3)        | 787.4667        | 0.0927        | 1.86        | (14:0/18:3)                                     | C41H71O12S        |
| SQDG(32:2)        | 789.4823        | 0.0291        | 1.75        | (16:0/16:1)                                     | C41H73O12S        |
| SQDG(32:1)        | 791.4988        | 1.1030        | 1.80        | (16:1/16:0) and (18:1/14:0)                     | C41H75O12S        |
| SQDG(32:0)        | 793.5135        | -0.0958       | 1.69        | *                                               | C41H77O12S        |
| SQDG(34:5)        | 811.4666        | -0.0333       | 1.72        | *                                               | C43H71O12S        |
| SQDG(34:4)        | 813.4839        | 1.9951        | 1.75        | (18:4/16:0)                                     | C43H73O12S        |
| SQDG(34:3)        | 815.4996        | 2.0515        | 1.82        | (18:3/16:0) and (18:2/16:1)                     | C43H75O12S        |
| SQDG(34:2)        | 817.5143        | 0.8856        | 1.72        | (18:1/16:1)                                     | C43H77O12S        |
| <b>SQDG(34:1)</b> | <b>819.5295</b> | <b>0.3331</b> | <b>1.75</b> | <b>(14:0/20:1), (16:0/18:1) and (16:1/18:0)</b> | <b>C43H79O12S</b> |
| SQDG(34:0)        | 821.5449        | 0.0280        | 1.8         | (16:0/18:0)                                     | C43H81O12S        |
| SQDG(36:7)        | 835.4666        | -0.0323       | 1.72        | **                                              | C45H71O12S        |
| SQDG(36:6)        | 837.4823        | 0.0275        | 1.75        | **                                              | C45H73O12S        |
| SQDG(36:5)        | 839.4978        | -0.1513       | 1.72        | (16:0/20:5)                                     | C45H75O12S        |
| SQDG(36:4)        | 841.5137        | 0.1474        | 1.80        | (16:0/20:4)                                     | C45H77O12S        |
| SQDG(36:3)        | 843.5291        | -0.1506       | 1.69        | **                                              | C45H79O12S        |
| SQDG(36:2)        | 845.5445        | -0.4459       | 1.75        | (18:1/18:1)                                     | C45H81O12S        |
| SQDG(38:9)        | 859.4666        | -0.0314       | 1.82        | *                                               | C47H71O12S        |
| SQDG(38:8)        | 861.4823        | 0.0267        | 1.87        | **                                              | C47H73O12S        |
| SQDG(38:7)        | 863.4979        | -0.0313       | 1.82        | (20:5/18:2)                                     | C47H75O12S        |
| SQDG(38:6)        | 865.5136        | 0.0277        | 1.75        | *                                               | C47H77O12S        |
| SQDG(38:5)        | 867.5305        | 1.4674        | 1.82        | (18:1/20:4)                                     | C47H79O12S        |
| SQDG(38:4)        | 869.5455        | 0.7165        | 2.18        | **                                              | C47H81O12S        |
| SQDG(38:0)        | 877.6075        | 0.0262        | 1.75        | **                                              | C47H89O12S        |
| SQDG(40:8)        | 889.5135        | -0.0854       | 1.86        | **                                              | C49H77O12S        |
| SQDG(40:7)        | 891.5293        | 0.0819        | 1.87        | *                                               | C49H79O12S        |
| SQDG(40:0)        | 905.6387        | -0.0850       | 1.82        | **                                              | C49H93O12S        |

**PC identified as [M + H]<sup>+</sup>**

|                 |                 |                |              |    |                   |
|-----------------|-----------------|----------------|--------------|----|-------------------|
| <b>PC(30:3)</b> | <b>700.4913</b> | <b>-0.6167</b> | <b>12.15</b> | *  | <b>C38H71NO8P</b> |
| PC(34:2)        | 758.5700        | 0.0237         | 11.88        | ** | C42H81NO8P        |
| PC(38:6)        | 806.5700        | 0.0223         | 11.28        | *  | C46H81NO8P        |

**PE identified as [M + H]<sup>+</sup>**

|          |          |         |      |             |            |
|----------|----------|---------|------|-------------|------------|
| PE(30:3) | 658.4426 | -3.3139 | 4.57 | **          | C35H65NO8P |
| PE(34:4) | 712.4924 | 0.9376  | 4.05 | (14:0/20:4) | C39H71NO8P |
| PE(34:2) | 716.5234 | 0.5136  | 4.19 | *           | C39H75NO8P |

|                 |                 |                |             |                             |                   |
|-----------------|-----------------|----------------|-------------|-----------------------------|-------------------|
| PE(34:1)        | 718.5387        | 0.0251         | 4.05        | (14:0/20:1)                 | C39H77NO8P        |
| PE(36:5)        | 738.5078        | 0.5660         | 4.10        | (16:1/20:4) and (16:0/20:5) | C41H73O8NP        |
| PE(36:4)        | 740.5226        | -0.5834        | 4.05        | **                          | C41H75NO8P        |
| PE(36:3)        | 742.5383        | -0.5145        | 4.20        | **                          | C41H77NO8P        |
| PE(36:2)        | 744.5557        | 1.8387         | 4.09        | (16:1/20:1)                 | C41H79O8NP        |
| PE(38:8)        | 760.4889        | -3.7239        | 4.01        | **                          | C43H71NO8P        |
| PE(38:7)        | 762.5059        | -1.9436        | 3.99        | **                          | C43H73NO8P        |
| PE(38:6)        | 764.5227        | -0.4343        | 4.05        | (18:1/20:5) and (20:4/18:2) | C43H75O8NP        |
| PE(38:5)        | 766.5369        | -2.3247        | 4.05        | (20:4/18:1) and (20:5/18:0) | C43H77NO8P        |
| PE(38:4)        | 768.553         | -1.7318        | 4.05        | **                          | C43H79O8NP        |
| PE(40:10)       | 784.4918        | 0.0867         | 4.05        | *                           | C45H71NO8P        |
| PE(40:9)        | 786.5071        | -0.3585        | 3.92        | (20:4/20:5)                 | C45H73O8NP        |
| <b>PE(40:8)</b> | <b>788.5228</b> | <b>-0.2942</b> | <b>3.92</b> | <b>(20:4/20:4)</b>          | <b>C45H75O8NP</b> |
| PE(40:7)        | 790.5389        | 0.2758         | 3.78        | *                           | C45H77NO8P        |
| PE(40:6)        | 792.5543        | -0.0391        | 3.92        | (20:4/20:2) and (20:3/20:3) | C45H79O8NP        |
| PE(40:5)        | 794.5700        | 0.0227         | 3.92        | (16:0/24:5)                 | C45H81O8NP        |
| PE(40:4)        | 796.5869        | 1.5918         | 3.86        | (20:0/20:4)                 | C45H83NO8P        |
| PE(42:11)       | 810.5045        | -3.5558        | 3.85        | **                          | C47H73NO8P        |
| PE(42:5)        | 822.6013        | 0.0219         | 3.92        | (20:4/22:1) and (20:5/22:0) | C47H85O8NP        |
| PE(42:4)        | 824.6169        | -0.0388        | 3.92        | (22:0/20:4)                 | C47H87O8NP        |
| PE(44:4)        | 852.6482        | -0.0375        | 3.92        | (20:4/24:0)                 | C49H91NO8P        |

**PG identified as [M – H]<sup>-</sup>**

|                 |                 |               |             |                                          |                   |
|-----------------|-----------------|---------------|-------------|------------------------------------------|-------------------|
| PG(32:1)        | 719.4863        | 0.0000        | 1.97        | (16:1/16:0) and (18:1/14:0)              | C38H72O10P        |
| PG(34:4)        | 741.4706        | -0.1349       | 1.97        | (14:0/20:4) and (16:1/18:3)              | C40H70O10P        |
| PG(34:3)        | 743.4863        | 0.0000        | 1.97        | (18:3/16:0) and (16:1/18:2)              | C40H72O10P        |
| PG(34:2)        | 745.5032        | 1.6097        | 1.92        | (14:0/20:2)                              | C40H74O10P        |
| <b>PG(34:1)</b> | <b>747.5201</b> | <b>3.3444</b> | <b>1.95</b> | <b>(16:0/18:1) and (14:0/20:1)</b>       | <b>C40H76O10P</b> |
| PG(34:0)        | 749.5336        | 0.4002        | 1.95        | *                                        | C40H78O10P        |
| PG(36:5)        | 767.4863        | 0.0000        | 1.86        | *                                        | C42H72O10P        |
| PG(36:4)        | 769.502         | 0.0000        | 1.92        | (20:4/16:0), (18:3/18:1) and (18:2/18:2) | C42H74O10P        |
| PG(36:3)        | 771.5176        | 0.0000        | 1.98        | (16:1/20:2), (16:0/20:3) and (18:2/18:1) | C42H76O10P        |
| PG(36:2)        | 773.5333        | 0.0000        | 1.92        | (18:1/18:1) and (16:0/20:2)              | C42H78O10P        |

**PI identified as [M – H]<sup>-</sup>**

|                 |                 |               |             |             |                   |
|-----------------|-----------------|---------------|-------------|-------------|-------------------|
| PI(30:2)        | 777.4554        | 0.0000        | 1.62        | *           | C39H70O13P        |
| PI(34:1)        | 835.5337        | 0.0000        | 1.97        | (18:1/16:0) | C43H80O13P        |
| PI(36:8)        | 849.4554        | -0.0094       | 1.82        | *           | C45H70O13P        |
| <b>PI(38:8)</b> | <b>877.4878</b> | <b>1.2536</b> | <b>1.75</b> | *           | <b>C47H74O13P</b> |
| PI(40:6)        | 909.5528        | 3.8481        | 1.82        | *           | C49H82O13P        |
| PI(40:5)        | 911.5664        | 1.5358        | 1.87        | *           | C49H84O13P        |
| PI(46:3)        | 999.6912        | 1.0423        | 2.03        | *           | C55H100O13P       |

**DGTS identified as [M + H]<sup>+</sup>**

|            |          |        |      |   |           |
|------------|----------|--------|------|---|-----------|
| DGTS(32:1) | 710.5935 | 0.0000 | 4.10 | * | C42H80O7N |
| DGTS(32:2) | 708.5779 | 0.1411 | 4.10 | * | C42H78O7N |

|                                               |                 |                |             |                                    |                  |
|-----------------------------------------------|-----------------|----------------|-------------|------------------------------------|------------------|
| DGTS(34:2)                                    | 736.6097        | 0.8145         | 4.16        | *                                  | C44H82O7N        |
| <b>DGTS(34:1)</b>                             | <b>738.6244</b> | <b>-0.5415</b> | <b>4.36</b> | *                                  | <b>C44H84O7N</b> |
| DGTS(36:4)                                    | 760.6091        | 0.00000        | 4.37        | *                                  | C46H82O7N        |
| <b>DGTA identified as [M + H]<sup>+</sup></b> |                 |                |             |                                    |                  |
| DGTA(30:1)                                    | 682.5622        | 0.0000         | 10.14       | *                                  | C40H76O7N        |
| DGTA(32:4)                                    | 704.5465        | 0.0000         | 9.46        | **                                 | C42H74O7N        |
| DGTA(32:3)                                    | 706.5615        | -0.9907        | 9.87        | *                                  | C42H76O7N        |
| DGTA(32:2)                                    | 708.5782        | 0.5645         | 9.66        | *                                  | C42H78O7N        |
| DGTA(32:1)                                    | 710.5933        | -0.2815        | 9.73        | *                                  | C42H80O7N        |
| DGTA(34:5)                                    | 730.5619        | -0.4106        | 9.76        | **                                 | C44H76O7N        |
| DGTA(34:4)                                    | 732.5782        | 0.5460         | 9.87        | (14:0/20:4)                        | C44H78O7N        |
| DGTA(34:3)                                    | 734.5913        | -2.9949        | 9.87        | *                                  | C44H80O7N        |
| DGTA(34:2)                                    | 736.6100        | 1.2218         | 9.24        | (18:2/16:0)                        | C44H82O7N        |
| DGTA(34:1)                                    | 738.6242        | -0.8123        | 9.87        | (16:1/18:0) and (16:0/18:1)        | C44H84O7N        |
| DGTA(36:7)                                    | 754.5622        | 0.0000         | 9.67        | **                                 | C46H76O7N        |
| DGTA(36:6)                                    | 756.5763        | -1.9826        | 9.87        | **                                 | C46H78O7N        |
| DGTA(36:5)                                    | 758.5927        | -1.0546        | 9.87        | (20:5/16:0) and (20:4/16:1)        | C46H80O7N        |
| <b>DGTA(36:4)</b>                             | <b>760.6080</b> | <b>-1.4462</b> | <b>9.87</b> | <b>(16:0/20:4) and (18:0/18:4)</b> | <b>C46H82O7N</b> |
| DGTA(36:3)                                    | 762.6229        | -2.4914        | 10.14       | (16:0/20:3)                        | C46H84O7N        |
| DGTA(36:2)                                    | 764.6387        | -2.2233        | 9.87        | *                                  | C46H86O7N        |
| DGTA(38:8)                                    | 780.5778        | 0.0000         | 9.19        | **                                 | C48H78O7N        |
| DGTA(38:7)                                    | 782.5929        | -0.7667        | 9.00        | **                                 | C48H80O7N        |
| DGTA(38:6)                                    | 784.6082        | -1.1471        | 9.87        | (18:2/20:4)                        | C48H82O7N        |
| DGTA(38:5)                                    | 786.6231        | -2.1611        | 9.42        | (18:1/20:4)                        | C48H84O7N        |
| DGTA(40:9)                                    | 806.5935        | 0.0000         | 9.00        | (20:5/20:4)                        | C50H80O7N        |
| DGTA(40:8)                                    | 808.6087        | -0.4947        | 9.00        | (20:4/20:4)                        | C50H82O7N        |
| DGTA(40:7)                                    | 810.6225        | -2.8373        | 9.00        | (20:3/20:4)                        | C50H84O7N        |
| DGTA(40:6)                                    | 812.6387        | -2.0919        | 9.81        | *                                  | C50H86O7N        |
| DGTA(42:11)                                   | 830.5902        | -3.9478        | 9.00        | ** , #                             | C52H80O7N        |
| DGTA(42:8)                                    | 836.6403        | -0.1542        | 9.05        | *                                  | C52H86O7N        |

\*: Molecular species identified by retention time and mass accuracy;

\*\* : Molecular species identified by retention time, mass accuracy, and polar head product ion;

# : Contribution of sodiated adduct ion

**Table S2.** Molecular species identified by HILIC-MS and MS/MS in *S. muticum*. The identification of different polar lipid classes and fatty acyl composition was confirmed by mass accuracy, retention time and the analysis of the LC-MS/MS spectra of each ion. C represents the total number of carbon atoms and N the total number of double bonds on the fatty acyl chains. The most abundant species are marked in bold.

| Lipid species (C:N)                                        | Observed m/z    | Delta (ppm)    | Retention time | Fatty acyl chains (C:N)                               | Formula           |
|------------------------------------------------------------|-----------------|----------------|----------------|-------------------------------------------------------|-------------------|
| <b>MGDG identified as [M + NH<sub>4</sub>]<sup>+</sup></b> |                 |                |                |                                                       |                   |
| MGDG(30:1)                                                 | 718.5464        | 0.0000         | 2.40           | (14:1/16:0) and (16:1/14:0)                           | C39H76NO10        |
| MGDG(30:0)                                                 | 720.5616        | -1.2490        | 2.31           | (16:0/14:0)                                           | C39H78NO10        |
| MGDG(32:8)                                                 | 732.4683        | -0.5461        | 2.14           | *                                                     | C41H66NO10        |
| MGDG(32:5)                                                 | 738.5156        | -0.0325        | 2.25           | *                                                     | C41H72NO10        |
| MGDG(32:4)                                                 | 740.5307        | 0.0000         | 2.22           | (14:0/18:4) and (16:1/16:3)                           | C41H74NO10        |
| MGDG(32:3)                                                 | 742.5463        | -0.1347        | 2.31           | (18:3/14:0), (18:2/14:1) and (16:0/16:3)              | C41H76NO10        |
| MGDG(32:2)                                                 | 744.562         | -0.8058        | 2.31           | (16:1/16:1), (16:0/16:2) and (18:2/14:0)              | C41H78NO10        |
| MGDG(32:1)                                                 | 746.5775        | -0.2679        | 2.2            | (18:1/14:0) and (16:0/16:1)                           | C41H80NO10        |
| MGDG(34:7)                                                 | 762.5163        | 0.8865         | 1.87           | (16:3/18:4)                                           | C43H72NO10        |
| MGDG(34:6)                                                 | 764.5314        | 0.1661         | 2.04           | (18:4/16:2) and (18:3/16:3)                           | C43H74NO10        |
| MGDG(34:5)                                                 | 766.5469        | -0.0313        | 2.20           | (16:1/18:4), (16:2/18:3) and (16:3/18:2)              | C43H76NO10        |
| MGDG(34:4)                                                 | 768.563         | 0.5205         | 2.31           | (16:1/18:3)                                           | C43H78NO10        |
| MGDG(34:3)                                                 | 770.5781        | -0.1609        | 2.20           | (18:3/16:0) and (16:1/18:2)                           | C43H80NO10        |
| MGDG(34:2)                                                 | 772.5933        | 0.0000         | 2.20           | (16:0/18:2) and (18:1/16:1)                           | C43H82NO10        |
| MGDG(34:1)                                                 | 774.6086        | -0.5164        | 2.20           | (18:1/16:0)                                           | C43H84NO10        |
| MGDG(36:9)                                                 | 786.5158        | 0.2543         | 2.32           | (20:5/16:4)                                           | C45H72NO10        |
| MGDG(36:8)                                                 | 788.5308        | -0.5960        | 2.20           | (18:4/18:4)                                           | C45H74NO10        |
| MGDG(36:7)                                                 | 790.5465        | -0.5060        | 2.20           | (18:3/18:4)                                           | C45H76NO10        |
| MGDG(36:6)                                                 | 792.5625        | 0.0000         | 2.19           | (20:5/16:1) and (18:3/18:3)                           | C45H78NO10        |
| MGDG(36:5)                                                 | 794.5777        | -0.6293        | 2.19           | (18:3/18:2), (20:4/16:1), (20:5/16:0) and (18:4/18:1) | C45H80NO10        |
| MGDG(36:4)                                                 | 796.5928        | -0.6277        | 2.19           | (18:2/18:2), (18:3/18:1) and (20:4/16:0)              | C45H82NO10        |
| MGDG(36:3)                                                 | 798.6071        | -3.0303        | 2.12           | (18:2/18:1), (18:3/18:0), (16:0/20:3) and (16:1/20:2) | C45H84NO10        |
| MGDG(36:2)                                                 | 800.6249        | -0.3422        | 2.31           | (20:2/16:0), (18:0/18:2), (18:1/18:1) and (16:1/20:1) | C45H86NO10        |
| MGDG(36:1)                                                 | 802.6408        | -0.0299        | 2.18           | (20:1/16:0) and (18:0/18:1)                           | C45H88NO10        |
| <b>MGDG(38:9)</b>                                          | <b>814.5466</b> | <b>-0.3978</b> | <b>2.20</b>    | <b>(20:5/18:4)</b>                                    | <b>C47H76NO10</b> |
| MGDG(38:8)                                                 | 816.5597        | -3.5147        | 2.31           | (20:4/18:4) and (20:5/18:3)                           | C47H78NO10        |
| MGDG(38:7)                                                 | 818.5759        | -2.8391        | 2.31           | (18:3/20:4) and (18:2/20:5)                           | C47H80NO10        |
| MGDG(38:6)                                                 | 820.5939        | 0.0000         | 2.20           | (18:1/20:5)                                           | C47H82NO10        |
| MGDG(38:5)                                                 | 822.6095        | -0.0243        | 2.31           | (18:2/20:3), (20:4/18:1), (20:2/18:3) and (20:1/18:4) | C47H84NO10        |
| MGDG(38:4)                                                 | 824.6251        | 0.0000         | 2.20           | *                                                     | C47H86NO10        |
| MGDG(40:10)                                                | 840.5637        | 1.3443         | 2.12           | (20:5/20:5)                                           | C49H78NO10        |
| MGDG(40:9)                                                 | 842.5781        | -0.1187        | 2.20           | (20:5/20:4)                                           | C49H80NO10        |
| MGDG(40:8)                                                 | 844.5925        | -1.6221        | 2.31           | (20:4/20:4)                                           | C49H82NO10        |
| MGDG(40:6)                                                 | 848.6252        | 0.0306         | 2.27           | *                                                     | C49H86NO10        |

|                                                            |                 |                |             |                                          |                   |
|------------------------------------------------------------|-----------------|----------------|-------------|------------------------------------------|-------------------|
| MGDG(42:9)                                                 | 870.6088        | -0.8316        | 1.67        | *                                        | C51H84NO10        |
| <b>MGMG identified as [M + NH<sub>4</sub>]<sup>+</sup></b> |                 |                |             |                                          |                   |
| MGMG(16:4)                                                 | 502.3016        | -0.0179        | 2.31        | (16:4)                                   | C25H44NO9         |
| MGMG(16:3)                                                 | 504.3173        | 0.0813         | 2.36        | (16:3)                                   | C25H46NO9         |
| MGMG(16:1)                                                 | 508.3485        | -0.1161        | 2.31        | (16:1)                                   | C25H50NO9         |
| MGMG(16:0)                                                 | 510.3642        | 0.0000         | 2.36        | (16:0)                                   | C25H52NO9         |
| <b>MGMG(18:4)</b>                                          | <b>530.3326</b> | <b>-0.5827</b> | <b>2.38</b> | <b>(18:4)</b>                            | <b>C27H48NO9</b>  |
| MGMG(18:3)                                                 | 532.3487        | 0.2649         | 2.36        | *                                        | C27H50NO9         |
| MGMG(18:2)                                                 | 534.3641        | -0.2040        | 2.36        | *                                        | C27H52NO9         |
| MGMG(18:1)                                                 | 536.3799        | 0.0764         | 2.31        | (18:1)                                   | C27H54NO9         |
| MGMG(20:5)                                                 | 556.3486        | 0.0737         | 2.36        | (20:5)                                   | C29H50NO9         |
| MGMG(20:4)                                                 | 558.3642        | -0.0161        | 2.31        | (20:4)                                   | C29H52NO9         |
| <b>DGDG identified as [M + NH<sub>4</sub>]<sup>+</sup></b> |                 |                |             |                                          |                   |
| DGDG(28:0)                                                 | 854.5827        | -1.6382        | 2.12        | (16:0/12:0)                              | C43H84O15N        |
| DGDG(32:3)                                                 | 904.5997        | 0.0000         | 2.38        | *                                        | C47H86O15N        |
| DGDG(32:2)                                                 | 906.6154        | 0.0000         | 2.36        | (14:0/18:2)                              | C47H88O15N        |
| DGDG(32:1)                                                 | 908.6310        | 0.0000         | 2.31        | (18:1/14:0) and (16:0/16:1)              | C47H90O15N        |
| DGDG(34:5)                                                 | 928.5997        | 0.0000         | 2.36        | *                                        | C49H86O15N        |
| DGDG(34:4)                                                 | 930.6154        | 0.0000         | 2.38        | (18:3/16:1) and (16:0/18:4)              | C49H88O15N        |
| DGDG(34:3)                                                 | 932.6310        | 0.0000         | 2.38        | (18:3/16:0) and (16:1/18:2)              | C49H90O15N        |
| DGDG(34:2)                                                 | 934.6447        | -2.1398        | 2.31        | (18:2/16:0)                              | C49H92O15N        |
| DGDG(34:1)                                                 | 936.6608        | -1.6014        | 2.43        | (18:1/16:0)                              | C49H94O15N        |
| DGDG(36:9)                                                 | 948.5684        | 0.0000         | 2.36        | *                                        | C51H82O15N        |
| DGDG(36:8)                                                 | 950.5844        | 0.3156         | 2.38        | (18:4/18:4)                              | C51H84O15N        |
| DGDG(36:7)                                                 | 952.6000        | 0.3149         | 2.04        | (18:4/18:3) and (20:5/16:2)              | C51H86O15N        |
| DGDG(36:6)                                                 | 954.6151        | -0.3143        | 2.40        | (18:3/18:3) and (20:5/16:1)              | C51H88O15N        |
| DGDG(36:5)                                                 | 956.6307        | -0.3136        | 2.38        | (20:5/16:0) and (16:1/20:4)              | C51H90O15N        |
| DGDG(36:3)                                                 | 960.6623        | 0.0000         | 2.40        | *                                        | C51H94O15N        |
| DGDG(36:2)                                                 | 962.6780        | 0.0000         | 2.40        | *                                        | C51H96O15N        |
| <b>DGDG(38:9)</b>                                          | <b>976.5997</b> | <b>0.0000</b>  | <b>2.31</b> | <b>(20:5/18:4)</b>                       | <b>C53H86O15N</b> |
| <b>SQDG identified as [M - H]<sup>-</sup></b>              |                 |                |             |                                          |                   |
| SQDG(28:0)                                                 | 737.4517        | 0.9804         | 1.84        | **                                       | C37H69O12S        |
| SQDG(30:1)                                                 | 763.4666        | -0.0354        | 1.76        | (14:0/16:1)                              | C39H71O12S        |
| SQDG(30:0)                                                 | 765.4817        | -0.7538        | 1.71        | (14:0/16:0)                              | C39H73O12S        |
| SQDG(32:4)                                                 | 785.4509        | -0.0980        | 1.72        | *                                        | C41H69O12S        |
| SQDG(32:3)                                                 | 787.4658        | -1.0502        | 1.76        | **                                       | C41H71O12S        |
| SQDG(32:2)                                                 | 789.4819        | -0.4775        | 1.64        | (14:0/18:2), (16:1/16:1) and (16:0/16:2) | C41H73O12S        |
| SQDG(32:1)                                                 | 791.4996        | 2.1137         | 1.83        | (16:1/16:0) and (14:0/18:1)              | C41H75O12S        |
| SQDG(32:0)                                                 | 793.5146        | 1.2905         | 1.83        | (16:0/16:0)                              | C41H77O12S        |
| SQDG(34:5)                                                 | 811.4666        | -0.0333        | 1.71        | *                                        | C43H71O12S        |
| SQDG(34:4)                                                 | 813.4832        | 1.1346         | 1.74        | (16:1/18:3) and (16:0/18:4)              | C43H73O12S        |
| SQDG(34:3)                                                 | 815.4999        | 2.4194         | 1.64        | (18:2/16:1) and (16:0/18:3)              | C43H75O12S        |
| SQDG(34:2)                                                 | 817.5142        | 0.7633         | 1.71        | (16:0/18:2) and (18:1/16:1)              | C43H77O12S        |

|                                              |                 |                |              |                                          |                   |
|----------------------------------------------|-----------------|----------------|--------------|------------------------------------------|-------------------|
| <b>SQDG(34:1)</b>                            | <b>819.5292</b> | <b>-0.0329</b> | <b>1.76</b>  | <b>(16:0/18:1)</b>                       | <b>C43H79O12S</b> |
| SQDG(36:7)                                   | 835.4669        | 0.3268         | 1.72         | **                                       | C45H71O12S        |
| SQDG(36:6)                                   | 837.4821        | -0.2113        | 1.76         | (18:3/18:3)                              | C45H73O12S        |
| SQDG(36:5)                                   | 839.4995        | 1.8737         | 1.64         | (20:5/16:0), (20:4/16:1) and (18:3/18:2) | C45H75O12S        |
| SQDG(36:4)                                   | 841.5121        | -1.7540        | 1.76         | (20:4/16:0) and (18:4/18:0)              | C45H77O12S        |
| SQDG(36:3)                                   | 843.5291        | -0.1506        | 1.74         | *                                        | C45H79O12S        |
| SQDG(36:2)                                   | 845.5428        | -2.4564        | 1.76         | (20:2/16:0)                              | C45H81O12S        |
| SQDG(36:1)                                   | 847.5624        | 2.2099         | 1.83         | (20:1/16:0)                              | C45H83O12S        |
| SQDG(38:9)                                   | 859.4667        | 0.0849         | 1.74         | **                                       | C47H71O12S        |
| SQDG(38:8)                                   | 861.4819        | -0.4376        | 1.73         | **                                       | C47H73O12S        |
| SQDG(38:7)                                   | 863.4980        | 0.0845         | 1.74         | **                                       | C47H75O12S        |
| SQDG(38:6)                                   | 865.5121        | -1.7053        | 1.70         | **                                       | C47H77O12S        |
| SQDG(38:5)                                   | 867.5299        | 0.7758         | 1.70         | **                                       | C47H79O12S        |
| SQDG(38:2)                                   | 873.5769        | 0.8276         | 1.83         | **                                       | C47H85O12S        |
| SQDG(38:1)                                   | 875.5903        | -1.7440        | 1.71         | (22:1/16:0)                              | C47H87O12S        |
| SQDG(38:0)                                   | 877.6070        | -0.5435        | 1.71         | (22:0/16:0)                              | C47H89O12S        |
| SQDG(40:8)                                   | 889.5137        | 0.1394         | 1.73         | (20:4/20:4)                              | C49H77O12S        |
| SQDG(40:6)                                   | 893.5448        | -0.0862        | 1.71         | *                                        | C49H81O12S        |
| SQDG(40:1)                                   | 903.6245        | 1.5194         | 1.74         | **                                       | C49H91O12S        |
| SQDG(40:0)                                   | 905.6388        | 0.0254         | 1.71         | *                                        | C49H93O12S        |
| <b>LPC identified as [M + H]<sup>+</sup></b> |                 |                |              |                                          |                   |
| <b>LPC(16:0)</b>                             | <b>496.3403</b> | <b>-0.0322</b> | <b>15.07</b> | <b>**</b>                                | <b>C24H51NO7P</b> |
| LPC(18:1)                                    | 522.3560        | 0.0632         | 15.07        | **                                       | C26H53NO7P        |
| LPC(18:0)                                    | 524.3716        | -0.0324        | 14.92        | *                                        | C26H55NO7P        |
| <b>PC identified as [M + H]<sup>+</sup></b>  |                 |                |              |                                          |                   |
| <b>PC(30:3)</b>                              | <b>700.4896</b> | <b>-3.0436</b> | <b>11.73</b> | <b>*</b>                                 | <b>C38H71NO8P</b> |
| PC(34:2)                                     | 758.5685        | -1.9537        | 12.19        | **                                       | C42H81NO8P        |
| PC(34:1)                                     | 760.5848        | -1.0939        | 12.33        | **                                       | C42H83NO8P        |
| PC(36:5)                                     | 780.5541        | -0.2959        | 11.89        | *                                        | C44H79NO8P        |
| PC(36:4)                                     | 782.5709        | 1.1731         | 10.98        | **                                       | C44H81NO8P        |
| PC(36:2)                                     | 786.6012        | -0.1042        | 11.84        | *                                        | C44H85NO8P        |
| PC(36:1)                                     | 788.6165        | -0.5478        | 11.34        | *                                        | C44H87NO8P        |
| PC(38:7)                                     | 804.5543        | -0.0385        | 10.88        | *                                        | C46H79NO8P        |
| PC(38:6)                                     | 806.5696        | -0.4736        | 11.10        | **                                       | C46H81NO8P        |
| PC(40:10)                                    | 826.5385        | -0.2202        | 10.88        | *                                        | C48H77NO8P        |
| <b>LPE identified as [M + H]<sup>+</sup></b> |                 |                |              |                                          |                   |
| LPE(20:5)                                    | 500.2778        | 0.1659         | 5.95         | **                                       | C25H43NO7P        |
| <b>LPE(20:4)</b>                             | <b>502.2926</b> | <b>-1.5270</b> | <b>5.76</b>  | <b>(20:4)</b>                            | <b>C25H45NO7P</b> |
| <b>PE identified as [M + H]<sup>+</sup></b>  |                 |                |              |                                          |                   |
| PE(30:3)                                     | 658.4425        | -3.4657        | 4.60         | **                                       | C35H65NO8P        |
| PE(30:1)                                     | 662.4761        | 0.0272         | 4.41         | *                                        | C35H69NO8P        |
| PE(32:2)                                     | 688.4927        | 1.4060         | 4.33         | *                                        | C37H71O8NP        |
| PE(32:1)                                     | 690.5068        | -0.8429        | 4.41         | (16:1/16:0)                              | C37H73NO8P        |

|                 |                 |                |             |                                          |                   |
|-----------------|-----------------|----------------|-------------|------------------------------------------|-------------------|
| PE(34:5)        | 710.4758        | -0.3969        | 4.04        | *                                        | C39H69NO8P        |
| PE(34:4)        | 712.4918        | 0.0954         | 4.10        | (20:4/14:0)                              | C39H71NO8P        |
| PE(34:3)        | 714.5074        | 0.0252         | 4.04        | *                                        | C39H73O8NP        |
| PE(34:2)        | 716.5230        | -0.0447        | 4.10        | **                                       | C39H75NO8P        |
| PE(34:1)        | 718.5385        | -0.2533        | 4.08        | (14:0/20:1)                              | C39H77NO8P        |
| PE(36:7)        | 734.4758        | -0.3839        | 4.08        | **                                       | C41H69NO8P        |
| PE(36:6)        | 736.4922        | 0.6354         | 4.04        | **                                       | C41H71NO8P        |
| PE(36:5)        | 738.5068        | -0.7881        | 4.10        | (20:5/16:0) and (16:1/20:4)              | C41H73O8NP        |
| PE(36:4)        | 740.5230        | -0.0432        | 4.32        | **                                       | C41H75NO8P        |
| PE(38:9)        | 758.4744        | -2.2176        | 4.13        | *                                        | C43H69NO8P        |
| PE(38:8)        | 760.4890        | -3.5924        | 3.97        | (18:4/20:4)                              | C43H71NO8P        |
| PE(38:7)        | 762.5063        | -1.4190        | 3.97        | (18:2/20:5) and (20:4/18:3)              | C43H73NO8P        |
| PE(38:6)        | 764.5227        | -0.4343        | 4.13        | (20:4/18:2)                              | C43H75O8NP        |
| PE(38:5)        | 766.5370        | -2.1943        | 3.97        | (20:4/18:1) and (20:5/18:0)              | C43H77NO8P        |
| PE(38:4)        | 768.5536        | -0.9511        | 3.97        | **                                       | C43H79O8NP        |
| PE(38:3)        | 770.5700        | 0.0234         | 3.97        | **                                       | C43H81NO8P        |
| PE(40:10)       | 784.4921        | 0.4691         | 3.97        | (20:5/20:5)                              | C45H71NO8P        |
| PE(40:9)        | 786.5071        | -0.3585        | 3.73        | (20:4/20:5)                              | C45H73O8NP        |
| <b>PE(40:8)</b> | <b>788.5226</b> | <b>-0.5479</b> | <b>3.73</b> | <b>(20:4/20:4) and (20:3/20:5)</b>       | <b>C45H75O8NP</b> |
| PE(40:7)        | 790.5395        | 1.0347         | 3.93        | (20:5/20:2) and (20:4/20:3)              | C45H77NO8P        |
| PE(40:6)        | 792.5547        | 0.4656         | 3.93        | (20:4/20:2) and (20:1/20:5)              | C45H79O8NP        |
| PE(40:5)        | 794.5705        | 0.6519         | 3.73        | (20:5/20:0), (20:4/20:1) and (20:2/20:3) | C45H81O8NP        |
| PE(40:4)        | 796.5858        | 0.2109         | 4.07        | (20:4/20:0)                              | C45H83NO8P        |
| PE(42:11)       | 810.5053        | -2.5688        | 4.13        | **                                       | C47H73NO8P        |
| PE(42:7)        | 818.5700        | 0.0220         | 3.93        | **                                       | C47H81O8NP        |
| PE(42:6)        | 820.5873        | 2.0327         | 4.07        | (20:5/22:1) and (20:4/22:2)              | C47H83NO8P        |
| PE(42:5)        | 822.6011        | -0.2212        | 3.81        | (20:4/22:1) and (20:5/22:0)              | C47H85O8NP        |
| PE(42:4)        | 824.6169        | -0.0388        | 3.81        | **                                       | C47H87O8NP        |
| PE(44:7)        | 846.6012        | -0.0969        | 4.07        | (20:4/24:3)                              | C49H85NO8P        |
| PE(44:4)        | 852.6482        | -0.0375        | 3.87        | **                                       | C49H91NO8P        |

**LPG identified as [M - H]<sup>-</sup>**

|                  |                 |               |             |               |                  |
|------------------|-----------------|---------------|-------------|---------------|------------------|
| <b>LPG(16:0)</b> | <b>483.2733</b> | <b>2.0734</b> | <b>2.16</b> | <b>(16:0)</b> | <b>C22H44O9P</b> |
|------------------|-----------------|---------------|-------------|---------------|------------------|

**PG identified as [M - H]<sup>-</sup>**

|                 |                 |               |             |                                          |                   |
|-----------------|-----------------|---------------|-------------|------------------------------------------|-------------------|
| PG(30:0)        | 693.4733        | 3.7493        | 2.14        | *                                        | C36H70O10P        |
| PG(32:2)        | 717.4707        | 0.0000        | 1.93        | (16:1/16:1) and (16:0/16:2)              | C38H70O10P        |
| PG(32:1)        | 719.4867        | 0.5560        | 1.90        | (16:1/16:0)                              | C38H72O10P        |
| PG(32:0)        | 721.5020        | 0.0000        | 2.02        | (16:0/16:0)                              | C38H74O10P        |
| PG(34:5)        | 739.4550        | 0.0000        | 1.91        | (18:4/16:1) and (16:0/18:5)              | C40H68O10P        |
| <b>PG(34:4)</b> | <b>741.4710</b> | <b>0.4046</b> | <b>1.90</b> | <b>(18:3/16:1)</b>                       | <b>C40H70O10P</b> |
| PG(34:3)        | 743.4863        | 0.0000        | 1.95        | (16:0/18:3) and (18:2/16:1)              | C40H72O10P        |
| PG(34:2)        | 745.5016        | -0.5366       | 1.93        | (14:0/20:2), (16:1/18:1) and (16:0/18:2) | C40H74O10P        |
| PG(34:1)        | 747.5179        | 0.4013        | 1.91        | (14:0/20:1), (16:1/18:0) and (18:1/16:0) | C40H76O10P        |
| PG(36:4)        | 769.5020        | 0.0000        | 1.91        | (20:4/16:0), (18:2/18:2) and (18:3/18:1) | C42H74O10P        |



|                                               |                 |               |             |                                                       |                   |
|-----------------------------------------------|-----------------|---------------|-------------|-------------------------------------------------------|-------------------|
| PG(36:3)                                      | 771.5176        | 0.0000        | 1.98        | (18:2/18:1), (16:1/20:2) and (16:0/20:3)              | C42H76O10P        |
| PG(36:2)                                      | 773.5333        | 0.0000        | 1.91        | (20:1/16:1), (16:0/20:2) and (18:1/18:1)              | C42H78O10P        |
| PG(38:5)                                      | 795.5176        | 0.0000        | 1.71        | (20:4/18:1) and (20:0/18:5)                           | C44H76O10P        |
| PG(40:6)                                      | 821.5357        | 2.9214        | 1.73        | *                                                     | C46H78O10P        |
| PG(42:6)                                      | 849.5670        | 2.8250        | 1.71        | (20:4/22:2), (18:4/24:2), (18:3/24:3) and (20:5/22:1) | C48H82O10P        |
| <b>PI identified as [M - H]<sup>-</sup></b>   |                 |               |             |                                                       |                   |
| PI(28:2)                                      | 749.4241        | 0.0000        | 2.24        | *                                                     | C37H66O13P        |
| PI(28:1)                                      | 751.4398        | 0.0000        | 2.18        | *                                                     | C37H68O13P        |
| <b>PI(34:2)</b>                               | <b>833.5180</b> | <b>0.0000</b> | <b>2.12</b> | <b>(18:2/16:0)</b>                                    | <b>C43H78O13P</b> |
| PI(34:1)                                      | 835.5337        | 0.0000        | 2.07        | (16:0/18:1)                                           | C43H80O13P        |
| PI(38:10)                                     | 873.4554        | -0.0092       | 1.72        | *                                                     | C47H70O13P        |
| PI(38:8)                                      | 877.4867        | 0.0000        | 1.84        | *                                                     | C47H74O13P        |
| PI(42:11)                                     | 927.5047        | 2.4798        | 2.10        | *                                                     | C51H76O13P        |
| PI(42:8)                                      | 933.5493        | 0.0000        | 1.77        | *                                                     | C51H82O13P        |
| <b>DGTS identified as [M + H]<sup>+</sup></b> |                 |               |             |                                                       |                   |
| DGTS(30:1)                                    | 682.5620        | -0.2930       | 4.34        | *                                                     | C40H76O7N         |
| DGTS(32:2)                                    | 708.5779        | 0.1411        | 4.30        | (18:2/14:0)                                           | C42H78O7N         |
| DGTS(32:1)                                    | 710.5913        | -3.0960       | 4.34        | (16:1/16:0)                                           | C42H80O7N         |
| DGTS(34:5)                                    | 730.5622        | 0.0000        | 4.38        | *                                                     | C44H76O7N         |
| DGTS(34:4)                                    | 732.5760        | -2.4571       | 4.33        | *                                                     | C44H78O7N         |
| DGTS(34:3)                                    | 734.5915        | -2.7226       | 4.30        | *                                                     | C44H80O7N         |
| <b>DGTS(34:2)</b>                             | <b>736.6100</b> | <b>1.2218</b> | <b>4.30</b> | <b>(16:0/18:2)</b>                                    | <b>C44H82O7N</b>  |
| DGTS(34:1)                                    | 738.6245        | -0.4062       | 4.08        | (16:0/18:1)                                           | C44H84O7N         |
| DGTS(36:7)                                    | 754.5622        | 0.0000        | 4.10        | *                                                     | C46H76O7N         |
| DGTS(36:6)                                    | 756.5769        | -1.1896       | 4.10        | *                                                     | C46H78O7N         |
| DGTS(36:5)                                    | 758.5932        | -0.3955       | 4.17        | *                                                     | C46H80O7N         |
| DGTS(36:4)                                    | 760.6083        | -1.0518       | 4.13        | *                                                     | C46H82O7N         |
| DGTS(38:5)                                    | 786.6241        | -0.8899       | 4.32        | (18:1/20:4)                                           | C48H84O7N         |
| <b>DGTA identified as [M + H]<sup>+</sup></b> |                 |               |             |                                                       |                   |
| DGTA(28:1)                                    | 654.5309        | 0.0000        | 9.55        | *                                                     | C38H72O7N         |
| DGTA(28:0)                                    | 656.5466        | 0.1523        | 10.29       | *                                                     | C38H74O7N         |
| DGTA(30:3)                                    | 678.5309        | 0.0000        | 9.95        | *                                                     | C40H72O7N         |
| DGTA(30:2)                                    | 680.5444        | -3.0858       | 10.29       | *                                                     | C40H74O7N         |
| DGTA(30:1)                                    | 682.5610        | -1.7581       | 10.43       | *                                                     | C40H76O7N         |
| DGTA(30:0)                                    | 684.5778        | 0.0000        | 10.29       | *                                                     | C40H78O7N         |
| DGTA(32:4)                                    | 704.5446        | -2.6968       | 10.06       | (16:3/16:1)                                           | C42H74O7N         |
| DGTA(32:3)                                    | 706.5618        | -0.5661       | 10.52       | (14:0/18:3)                                           | C42H76O7N         |
| DGTA(32:2)                                    | 708.5780        | 0.2823        | 10.70       | (16:0/16:2) and (18:2/14:0)                           | C42H78O7N         |
| DGTA(32:1)                                    | 710.5916        | -2.6738       | 10.41       | (16:1/16:0)                                           | C42H80O7N         |
| DGTA(34:6)                                    | 728.5443        | -3.0197       | 10.09       | *                                                     | C44H74O7N         |
| DGTA(34:5)                                    | 730.5622        | 0.0000        | 9.70        | *                                                     | C44H76O7N         |
| DGTA(34:4)                                    | 732.5757        | -2.8666       | 9.35        | (20:4/14:0)                                           | C44H78O7N         |
| DGTA(34:3)                                    | 734.5916        | -2.5865       | 9.70        | (16:0/18:3)                                           | C44H80O7N         |

|                   |                 |                |             |                                           |                  |
|-------------------|-----------------|----------------|-------------|-------------------------------------------|------------------|
| DGTA(34:2)        | 736.6071        | -2.7151        | 9.43        | (18:2/16:0)                               | C44H82O7N        |
| DGTA(34:1)        | 738.6248        | 0.0000         | 9.70        | (16:0/18:1)                               | C44H84O7N        |
| DGTA(36:8)        | 752.5461        | -0.5581        | 9.70        | *                                         | C46H74O7N        |
| DGTA(36:7)        | 754.5621        | -0.1325        | 9.70        | **                                        | C46H76O7N        |
| DGTA(36:6)        | 756.5762        | -2.1148        | 9.70        | *                                         | C46H78O7N        |
| DGTA(36:5)        | 758.5930        | -0.6591        | 9.70        | (18:2/18:3), (20:5/16:0). and (20:4/16:1) | C46H80O7N        |
| <b>DGTA(36:4)</b> | <b>760.6084</b> | <b>-0.9203</b> | <b>9.29</b> | <b>(16:0/20:4)</b>                        | <b>C46H82O7N</b> |
| DGTA(36:2)        | 764.6391        | -1.7001        | 9.70        | (20:2/16:0)                               | C46H86O7N        |
| DGTA(36:1)        | 766.6561        | 0.0000         | 9.34        | (16:0/20:1)                               | C46H88O7N        |
| DGTA(38:8)        | 780.5751        | -3.4590        | 9.29        | *                                         | C48H78O7N        |
| DGTA(38:7)        | 782.5914        | -2.6834        | 9.34        | (18:3/20:4)                               | C48H80O7N        |
| DGTA(38:6)        | 784.6084        | -0.8922        | 9.29        | (18:2/20:4)                               | C48H82O7N        |
| DGTA(38:5)        | 786.6235        | -1.6526        | 9.70        | (20:4/18:1)                               | C48H84O7N        |
| DGTA(38:4)        | 788.6402        | -0.2536        | 9.34        | *                                         | C48H86O7N        |
| DGTA(40:10)       | 804.5759        | -2.3615        | 9.29        | *                                         | C50H78O7N        |
| DGTA(40:9)        | 806.5915        | -2.4796        | 9.70        | (20:4/20:5)                               | C50H80O7N        |
| DGTA(40:8)        | 808.6091        | 0.0000         | 9.34        | (20:4/20:4)                               | C50H82O7N        |
| DGTA(40:6)        | 812.6392        | -1.4767        | 9.36        | (20:2/20:4)                               | C50H86O7N        |
| DGTA(40:5)        | 814.6561        | 0.0000         | 9.34        | (20:1/20:4)                               | C50H88O7N        |
| DGTA(42:11)       | 830.5935        | 0.0253         | 9.34        | *                                         | C52H80O7N        |
| DGTA(42:9)        | 834.6220        | -3.3296        | 9.29        | *                                         | C52H84O7N        |
| DGTA(42:6)        | 840.6731        | 1.6308         | 8.88        | *                                         | C52H90O7N        |
| DGTA(42:5)        | 842.6885        | 1.3303         | 8.58        | *                                         | C52H92O7N        |

\*: Molecular species identified by retention time and mass accuracy;

\*\* : Molecular species identified by retention time, mass accuracy, and polar head product ion;

#: Contribution of sodiated adduct ion

**Table S3** List of common and unique lipid species in the lipidome of *B. bifurcata* and *S. muticum*.

| Unique lipid species        |                          | Common lipid species                    |
|-----------------------------|--------------------------|-----------------------------------------|
| <i>Bifurcaria bifurcata</i> | <i>Sargassum muticum</i> | <i>B. bifurcata</i>   <i>S. muticum</i> |
| MGDG(30:4)                  | MGDG(30:0)               | MGDG(30:1)                              |
| MGDG(38:10)                 | MGDG(32:5)               | MGDG(32:1)                              |
| DGDG(36:4)                  | MGDG(32:8)               | MGDG(32:2)                              |
| DGDG(38:8)                  | MGDG(34:5)               | MGDG(32:3)                              |
| SQDG(34:0)                  | MGDG(34:6)               | MGDG(32:4)                              |
| SQDG(38:4)                  | MGDG(34:7)               | MGDG(34:1)                              |
| SQDG(40:7)                  | MGDG(36:1)               | MGDG(34:2)                              |
| PE(36:2)                    | MGDG(36:9)               | MGDG(34:3)                              |
| PE(36:3)                    | MGDG(38:4)               | MGDG(34:4)                              |
| PG(34:0)                    | MGDG(40:6)               | MGDG(36:2)                              |
| PG(36:5)                    | MGDG(42:9)               | MGDG(36:3)                              |
| PI(30:2)                    | MGMG(16:0)               | MGDG(36:4)                              |
| PI(36:8)                    | MGMG(16:1)               | MGDG(36:5)                              |
| PI(40:5)                    | MGMG(16:3)               | MGDG(36:6)                              |
| PI(40:6)                    | MGMG(16:4)               | MGDG(36:7)                              |
| PI(46:3)                    | MGMG(18:1)               | MGDG(36:8)                              |
| DGTA(36:3)                  | MGMG(18:2)               | MGDG(38:5)                              |
| DGTA(40:7)                  | MGMG(18:3)               | MGDG(38:6)                              |
| DGTA(42:8)                  | MGMG(18:4)               | MGDG(38:7)                              |
|                             | MGMG(20:4)               | MGDG(38:8)                              |
|                             | MGMG(20:5)               | MGDG(38:9)                              |
|                             | DGDG(34:5)               | MGDG(40:10)                             |
|                             | DGDG(36:2)               | MGDG(40:8)                              |
|                             | DGDG(36:3)               | MGDG(40:9)                              |
|                             | DGDG(36:8)               | DGDG(28:0)                              |
|                             | DGDG(36:9)               | DGDG(32:1)                              |
|                             | SQDG(28:0)               | DGDG(32:2)                              |
|                             | SQDG(32:4)               | DGDG(32:3)                              |
|                             | SQDG(36:1)               | DGDG(34:1)                              |
|                             | SQDG(38:1)               | DGDG(34:2)                              |
|                             | SQDG(38:2)               | DGDG(34:3)                              |
|                             | SQDG(40:1)               | DGDG(34:4)                              |
|                             | SQDG(40:6)               | DGDG(36:5)                              |
|                             | LPC(16:0)                | DGDG(36:6)                              |
|                             | LPC(18:0)                | DGDG(36:7)                              |
|                             | LPC(18:1)                | DGDG(38:9)                              |
|                             | PC(34:1)                 | SQDG(30:0)                              |
|                             | PC(36:1)                 | SQDG(30:1)                              |
|                             | PC(36:2)                 | SQDG(32:0)                              |
|                             | PC(36:4)                 | SQDG(32:1)                              |
|                             | PC(36:5)                 | SQDG(32:2)                              |
|                             | PC(38:7)                 | SQDG(32:3)                              |
|                             | PC(40:10)                | SQDG(34:1)                              |
|                             | LPE(20:4)                | SQDG(34:2)                              |
|                             | LPE(20:5)                | SQDG(34:3)                              |
|                             | PE(30:1)                 | SQDG(34:4)                              |
|                             | PE(32:1)                 | SQDG(34:5)                              |
|                             | PE(32:2)                 | SQDG(36:2)                              |
|                             | PE(34:3)                 | SQDG(36:3)                              |
|                             | PE(34:5)                 | SQDG(36:4)                              |
|                             | PE(36:6)                 | SQDG(36:5)                              |
|                             | PE(36:7)                 | SQDG(36:6)                              |
|                             | PE(38:3)                 | SQDG(36:7)                              |
|                             | PE(38:9)                 | SQDG(38:0)                              |
|                             | PE(42:6)                 | SQDG(38:5)                              |

---

|             |            |
|-------------|------------|
| PE(42:7)    | SQDG(38:6) |
| PE(44:7)    | SQDG(38:7) |
| LPG(16:0)   | SQDG(38:8) |
| PG(30:0)    | SQDG(38:9) |
| PG(32:0)    | SQDG(40:0) |
| PG(32:2)    | SQDG(40:8) |
| PG(34:5)    | PC(30:3)   |
| PG(38:5)    | PC(34:2)   |
| PG(40:6)    | PC(38:6)   |
| PG(42:6)    | PE(30:3)   |
| PI(28:1)    | PE(34:1)   |
| PI(28:2)    | PE(34:2)   |
| PI(34:2)    | PE(34:4)   |
| PI(38:10)   | PE(36:4)   |
| PI(42:11)   | PE(36:5)   |
| PI(42:8)    | PE(38:4)   |
| DGTS(30:1)  | PE(38:5)   |
| DGTS(34:3)  | PE(38:6)   |
| DGTS(34:4)  | PE(38:7)   |
| DGTS(34:5)  | PE(38:8)   |
| DGTS(36:5)  | PE(40:10)  |
| DGTS(36:6)  | PE(40:4)   |
| DGTS(36:7)  | PE(40:5)   |
| DGTS(38:5)  | PE(40:6)   |
| DGTA(28:0)  | PE(40:7)   |
| DGTA(28:1)  | PE(40:8)   |
| DGTA(30:0)  | PE(40:9)   |
| DGTA(30:2)  | PE(42:11)  |
| DGTA(30:3)  | PE(42:4)   |
| DGTA(34:6)  | PE(42:5)   |
| DGTA(36:1)  | PE(44:4)   |
| DGTA(36:8)  | PG(32:1)   |
| DGTA(38:4)  | PG(34:1)   |
| DGTA(40:10) | PG(34:2)   |
| DGTA(40:5)  | PG(34:3)   |
| DGTA(42:5)  | PG(34:4)   |
| DGTA(42:6)  | PG(36:2)   |
| DGTA(42:9)  | PG(36:3)   |
|             | PG(36:4)   |
|             | PI(34:1)   |
|             | PI(38:8)   |
|             | DGTS(32:1) |
|             | DGTS(32:2) |
|             | DGTS(34:2) |
|             | DGTS(34:1) |
|             | DGTS(36:4) |
|             | DGTA(30:1) |
|             | DGTA(32:1) |
|             | DGTA(32:2) |
|             | DGTA(32:3) |
|             | DGTA(32:4) |
|             | DGTA(34:1) |
|             | DGTA(34:2) |
|             | DGTA(34:3) |
|             | DGTA(34:4) |
|             | DGTA(34:5) |
|             | DGTA(36:2) |
|             | DGTA(36:4) |
|             | DGTA(36:5) |
|             | DGTA(36:6) |
|             | DGTA(36:7) |

---

---

DGTA(38:5)

DGTA(38:6)

DGTA(38:7)

DGTA(38:8)

DGTA(40:6)

DGTA(40:8)

DGTA(40:9)

DGTA(42:11)

---
